# Supplementary material
Source: PubMed Central journal article supplement (PMC8257624)
Supplement: 41416_2021_1389_MOESM1_ESM.pdf [file 41416_2021_1389_MOESM1_ESM.pdf]

**Phase I study of single-agent WNT974, a first-in-class Porcupine inhibitor, in patients with advanced solid tumours**

**Supplementary information**

**Supplementary Table 1.** Additional information for patients in the expansion phase.

| Primary diagnosis                              | Baseline genetic alterations related to study eligibility and the Wnt pathway ( <i>allelic frequency</i> <sup>a</sup> ) |                          |                |                                                            |                  | Best percentage change in sum of target lesion diameters (%) |
|------------------------------------------------|-------------------------------------------------------------------------------------------------------------------------|--------------------------|----------------|------------------------------------------------------------|------------------|--------------------------------------------------------------|
|                                                | BRAF V600E                                                                                                              | RNF43 mutation           | RSPO fusion    | Other selected Wnt pathway alteration <sup>b</sup>         |                  |                                                              |
|                                                |                                                                                                                         |                          |                | Mutation                                                   | Other alteration |                                                              |
| CRC <sup>c</sup>                               | V600E                                                                                                                   | W416X                    | –              | –                                                          | –                | –11.54                                                       |
| Neuroendocrine carcinoma <sup>c</sup>          | –                                                                                                                       | R145                     | –              | –                                                          | –                | 41.67                                                        |
| SCLC <sup>d</sup>                              | –                                                                                                                       | E187L (28.0)             | –              | –                                                          | –                | 4.44                                                         |
| CRC <sup>d</sup>                               | V600E (18.0)                                                                                                            | L163fs*2 (27.0)          | –              | –                                                          | –                | 15.38                                                        |
| Pancreatic cancer <sup>d</sup>                 | –                                                                                                                       | H427fs*16 (45.0)         | –              | –                                                          | –                | 6.08                                                         |
| CRC <sup>d</sup>                               | WT                                                                                                                      | D140H (25.0)             | –              | APC E1151* (27.0)                                          | –                | 36.05                                                        |
| CRC <sup>d</sup>                               | WT                                                                                                                      | Y177C                    | –              | –                                                          | –                | 18.73                                                        |
| CRC <sup>d</sup>                               | V600E (19.0)                                                                                                            | –                        | E2 gene fusion | –                                                          | –                | 5.43                                                         |
| CRC <sup>d</sup>                               | WT                                                                                                                      | R114W (26.6)             | –              | APC G1312* (78.8)                                          | –                | 81.67                                                        |
| Chondrosarcoma <sup>e</sup>                    | –                                                                                                                       | –                        | –              | ZNRF3 S457del (34.4)                                       | –                | 16.10                                                        |
| Head and neck cancer <sup>d</sup>              | –                                                                                                                       | –                        | –              | ZNRF3 V156M (49.0)                                         | –                | UNK                                                          |
| CRC <sup>d</sup>                               | V600E (16.0)                                                                                                            | WT                       | –              | APC R213* (14.1)<br>APC Q1480* (20.2)<br>ZNRF3 N29K (15.4) | –                | 6.38                                                         |
| Pancreatic cancer <sup>d</sup>                 | –                                                                                                                       | L418M                    | –              | APC R2237* (34.0)                                          | –                | –4.76                                                        |
| Pancreatic cancer <sup>d</sup>                 | –                                                                                                                       | R343H                    | –              | –                                                          | –                | 64.81                                                        |
| Ovarian <sup>d</sup>                           | –                                                                                                                       | P686R                    | –              | –                                                          | –                | 2.56                                                         |
| Pancreatic cancer <sup>c</sup>                 | –                                                                                                                       | P231L<br>R343H<br>L418M  | –              | –                                                          | –                | 37.50                                                        |
| Endometrial cancer <sup>d</sup>                | –                                                                                                                       | –                        | –              | CTNNB1 D32Y (36.7)                                         | –                | 64.84                                                        |
| CRC <sup>d</sup>                               | V600E (12.0)                                                                                                            | L311fs*10<br>8 (10.0)    | –              | ZNRF3 S178fs*25 (10.0)                                     | –                | UNK                                                          |
| Appendiceal goblet cell carcinoma <sup>d</sup> | –                                                                                                                       | S41*<br>Y450fs*32 (22.0) | –              | –                                                          | –                | –26.81                                                       |

|                                  |    |              |   |                                                                                                            |                                          |       |
|----------------------------------|----|--------------|---|------------------------------------------------------------------------------------------------------------|------------------------------------------|-------|
| Gastric cancer <sup>c</sup>      | –  | Exon 4       | – | –                                                                                                          | –                                        | –5.34 |
| Sarcoma <sup>c</sup>             | –  | V107I        | – | –                                                                                                          | –                                        | 6.06  |
| Cholangio-carcinoma <sup>c</sup> | –  | G659fs*41    | – | APC K1616                                                                                                  | –                                        | 34.04 |
| Cholangio-carcinoma <sup>c</sup> | –  | L302M        | – | –                                                                                                          | –                                        | UNK   |
| Pancreatic cancer <sup>e</sup>   | –  | R371* (34.0) | – | –                                                                                                          | –                                        | 23.46 |
| Pancreatic cancer <sup>e</sup>   | –  | –            | – | –                                                                                                          | LRP6 [amplification]                     | 37.78 |
| CRC <sup>d</sup>                 | WT | R531H (10.0) | – | APC S1465fs*3 (8.0)<br>APC T1208fs*57 (10.0)<br>LRP6 P1059S (8.0)<br>WISP3 R339K (9.0)<br>ZNRF3 P79L (9.0) | RNF43 (11.0)<br>[splice site alteration] | 30.0  |
| Pancreatic cancer <sup>d</sup>   | –  | R117G (43.0) | – | –                                                                                                          | –                                        | 4.96  |
| Endometrial cancer <sup>c</sup>  | –  | G659fs*41    | – | –                                                                                                          | –                                        | 10.61 |

Patients with some reduction in target lesion size are highlighted in blue.

<sup>a</sup>Allelic frequency provided where available.

<sup>b</sup>Selected genes (*RNF43*; *RSPO*; *ZNRF*; *APC*; *CTNNB1*; *LRP6*; *WISP3*).

<sup>c</sup>Genetic alterations as determined by local testing.

<sup>d</sup>Genetic alterations as determined by local and central testing.

<sup>e</sup>Genetic alterations as determined by central (next-generation sequencing) testing.

Abbreviations: CRC, colorectal cancer; del, deletion; fs, frameshift; RNF43, ring finger protein 43;

RSPO, R-spondin; SCLC, small cell lung cancer; UNK, unknown; WT, wild type.

**Supplementary Table 2.** Pharmacokinetic parameters of WNT974 in patients following oral administration of WNT974.

|                                    | WNT974<br>5 mg<br>QD | WNT974<br>7.5 mg<br>QD | WNT974<br>10 mg<br>QD | WNT974<br>15 mg<br>QD | WNT974<br>20 mg<br>QD | WNT974<br>22.5 mg<br>QD | WNT974<br>30 mg<br>QD | WNT974<br>30 mg<br>4/7 QD | WNT974<br>45 mg<br>4/7 QD | WNT974<br>5 mg<br>BID |
|------------------------------------|----------------------|------------------------|-----------------------|-----------------------|-----------------------|-------------------------|-----------------------|---------------------------|---------------------------|-----------------------|
| C1D1                               |                      |                        |                       |                       |                       |                         |                       |                           |                           |                       |
| <i>n</i>                           | 6                    | 6                      | 38                    | 10                    | 10                    | 6                       | 5                     | 4                         | 3                         | 5                     |
| <i>C</i> <sub>max</sub><br>(ng/mL) | 33.0<br>(26.4)       | 48.1<br>(47.4)         | 72.6<br>(51.0)        | 90.9<br>(29.0)        | 144<br>(24.6)         | 178<br>(40.2)           | 143<br>(64.5)         | 208<br>(46.1)             | 473<br>(88.6)             | 25.6<br>(65.2)        |
| <i>T</i> <sub>max</sub> (h)        | 1.98<br>(1.0–4.0)    | 2.00<br>(2.0–4.0)      | 1.75<br>(0.5–4.0)     | 2.00<br>(1.0–3.1)     | 2.02<br>(1.0–4.1)     | 1.00<br>(0.5–3.0)       | 1.00<br>(0.5–3.1)     | 2.50<br>(2.0–3.0)         | 1.00<br>(0.5–6.0)         | 3.00<br>(2.0–3.2)     |
| AUC <sub>tau</sub><br>(h·ng/mL)    | 245<br>(9.8)         | 290<br>(43.4)          | 434<br>(40.1)         | 567<br>(27.2)         | 1,083<br>(27.2)       | 965<br>(33.8)           | 928<br>(63.6)         | 1,681<br>(60.6)           | 3,432<br>(13.9)           | 103<br>(64.1)         |
| <i>T</i> <sub>1/2</sub>            | 4.83<br>(56.1)       | 5.14<br>(42.8)         | 5.67<br>(23.7)        | 6.28<br>(19.3)        | 7.60<br>(51.0)        | 6.50<br>(33.5)          | 7.57<br>(59.8)        | 5.42<br>(26.6)            | 5.34<br>(32.2)            | 10.19<br>(ND)         |
| C1D15                              |                      |                        |                       |                       |                       |                         |                       |                           |                           |                       |
| <i>n</i>                           | 4                    | 5                      | 30                    | 8                     | 7                     | 4                       | 4                     | 4                         | 3                         | 4                     |
| <i>C</i> <sub>max</sub><br>(ng/mL) | 33.4<br>(52.9)       | 61.4<br>(55.1)         | 90.4<br>(44.0)        | 128<br>(46.5)         | 197<br>(38.2)         | 191<br>(56.0)           | 251<br>(64.6)         | 260<br>(52.5)             | 373<br>(51.4)             | 31.3<br>(94.5)        |
| <i>T</i> <sub>max</sub> (h)        | 2.98<br>(0.5–3.0)    | 1.00<br>(0.5–4.1)      | 1.98<br>(0.5–4.0)     | 2.50<br>(0.5–3.0)     | 2.00<br>(0.5–3.0)     | 1.00<br>(1.0–1.1)       | 1.00<br>(1.0–1.0)     | 2.50<br>(2.0–6.1)         | 4.00<br>(1.0–6.0)         | 3.00<br>(1.0–4.0)     |
| AUC <sub>tau</sub><br>(h·ng/mL)    | 294<br>(29.6)        | 443<br>(8.92)          | 627<br>(37.7)         | 793<br>(36.0)         | 1,634<br>(35.8)       | 1,125<br>(45.2)         | 1,879<br>(40.1)       | 2,082<br>(71.7)           | 3,693<br>(32.1)           | 141<br>(88.3)         |
| <i>T</i> <sub>1/2</sub>            | 6.82<br>(39.1)       | 6.82<br>(15.1)         | 6.33<br>(20.7)        | 6.18<br>(14.4)        | 7.79<br>(29.01)       | 9.52<br>(17.0)          | 6.29<br>(19.9)        | 6.31<br>(12.7)            | 5.35<br>(15.8)            | 4.84<br>(20.5)        |
| <i>C</i> <sub>min</sub><br>(ng/mL) | 2.40<br>(56.6)       | 3.91<br>(66.4)         | 4.67<br>(59.4)        | 4.92<br>(42.5)        | 16.4<br>(162)         | 10.5<br>(107)           | 17.2<br>(68.0)        | NA                        | NA                        | 4.71<br>(135)         |
| Racc                               | 1.16<br>(21.0)       | 1.31<br>(26.2)         | 1.50<br>(34.5)        | 1.50<br>(35.7)        | 1.58<br>(52.6)        | 1.18<br>(32.9)          | 1.67<br>(16.8)        | NA                        | NA                        | 1.61<br>(27.6)        |

Geometric mean (geometric CV%) provided, except for *T*<sub>max</sub> which is median (range).

Dose escalation and expansion phases; data cutoff: 2 March 2017.

Abbreviations: 4/7 QD, drug administered 4 days on, 3 days off; AUC<sub>tau</sub>, area under the curve for the dosing interval; BID, twice daily; C, Cycle; *C*<sub>max</sub>, maximum concentration;

*C*<sub>min</sub>, minimum observed plasma concentration during a dosing interval; D, day; NA, not applicable;

ND, no data available; QD, once daily; Racc, accumulation ratio, calculated as AUC<sub>tau</sub>, Day 15/AUC<sub>tau</sub>,

Day 1; *T*<sub>1/2</sub>, terminal elimination half-life; *T*<sub>max</sub>, time of *C*<sub>max</sub>.

**Supplementary Table 3.** Pharmacokinetic parameters of LHA333 in patients following oral administration of WNT974.

|                                    | WNT974<br>5 mg<br>QD | WNT974<br>7.5 mg<br>QD | WNT974<br>10 mg<br>QD | WNT974<br>15 mg<br>QD | WNT974<br>20 mg<br>QD | WNT974<br>22.5 mg<br>QD | WNT974<br>30 mg<br>QD | WNT974<br>30 mg<br>4/7 QD | WNT974<br>45 mg<br>4/7 QD | WNT974<br>5 mg<br>BID |
|------------------------------------|----------------------|------------------------|-----------------------|-----------------------|-----------------------|-------------------------|-----------------------|---------------------------|---------------------------|-----------------------|
| C1D1                               |                      |                        |                       |                       |                       |                         |                       |                           |                           |                       |
| <i>n</i>                           | 6                    | 6                      | 38                    | 10                    | 10                    | 6                       | 5                     | 4                         | 3                         | 5                     |
| <i>C</i> <sub>max</sub><br>(ng/mL) | 5.61<br>(35.1)       | 12.0<br>(43.8)         | 19.1<br>(64.1)        | 26.9<br>(63.6)        | 37.5<br>(76.7)        | 48.9<br>(47.4)          | 41.2<br>(84.3)        | 72.6<br>(36.5)            | 129<br>(179.8)            | 6.88<br>(71.2)        |
| <i>T</i> <sub>max</sub> (h)        | 3.00<br>(2.0–6.0)    | 3.07<br>(2.0–6.0)      | 2.03<br>(0.5–8.0)     | 3.00<br>(2.0–8.0)     | 3.00<br>(1.0–8.0)     | 2.00<br>(0.6–3.1)       | 1.00<br>(1.0–3.1)     | 3.00<br>(2.0–4.0)         | 2.00<br>(0.5–8.0)         | 3.00<br>(2.0–6.0)     |
| AUC <sub>tau</sub><br>(h·ng/mL)    | 54.2<br>(55.4)       | 149<br>(33.2)          | 208<br>(50.9)         | 333<br>(46.3)         | 426<br>(37.3)         | 457<br>(28.5)           | 458<br>(68.9)         | 802<br>(33.4)             | 1,907<br>(1.20)           | 36.5<br>(81.3)        |
| M/P ratio                          | ND                   | 0.52<br>(88.9)         | 0.50<br>(34.0)        | 0.58<br>(55.8)        | 0.41<br>(57.2)        | 0.47<br>(25.9)          | 0.49<br>(29.7)        | 0.47<br>(41.6)            | 0.55<br>(14.2)            | ND                    |
| C1D15                              |                      |                        |                       |                       |                       |                         |                       |                           |                           |                       |
| <i>n</i>                           | 4                    | 5                      | 30                    | 8                     | 7                     | 4                       | 4                     | 4                         | 3                         | 4                     |
| <i>C</i> <sub>max</sub><br>(ng/mL) | 6.17<br>(66.1)       | 9.39<br>(68.1)         | 19.4<br>(58.2)        | 29.7<br>(42.3)        | 51.6<br>(57.4)        | 34.6<br>(75.7)          | 46.4<br>(104.0)       | 62.9<br>(47.4)            | 87.2<br>(80.6)            | 7.04<br>(52.8)        |
| <i>T</i> <sub>max</sub> (h)        | 3.50<br>(1.0–6.0)    | 1.00<br>(0.5–8.0)      | 2.54<br>(0.5–7.5)     | 3.00<br>(0.5–4.1)     | 1.03<br>(0.5–6.1)     | 1.00<br>(1.0–1.1)       | 1.00<br>(1.0–0.8)     | 2.50<br>(2.0–8.0)         | 4.00<br>(3.0–6.0)         | 9.00<br>(1.0–12.0)    |
| AUC <sub>tau</sub><br>(h·ng/mL)    | 95.7<br>(84.4)       | 119<br>(18.4)          | 222<br>(53.7)         | 345<br>(42.2)         | 657<br>(35.4)         | 367<br>(49.3)           | 644<br>(78.0)         | 810<br>(44.0)             | 1,527<br>(59.2)           | 34.1<br>(124.2)       |
| M/P ratio                          | 0.25<br>(86.7)       | 0.26<br>(10.5)         | 0.33<br>(49.2)        | 0.42<br>(53.3)        | 0.39<br>(55.0)        | 0.31<br>(52.6)          | 0.31<br>(34.5)        | NA                        | NA                        | 0.23<br>(32.5)        |
| Racc                               | 1.59<br>(20.6)       | 0.86<br>(37.2)         | 1.16<br>(34.5)        | 1.09<br>(35.7)        | 1.30<br>(26.2)        | 0.78<br>(56.2)          | 0.98<br>(48.6)        | NA                        | NA                        | 1.17<br>(42.8)        |

Geometric mean (geometric CV%) provided, except for *T*<sub>max</sub> which is median (range).

Dose escalation and expansion phases; data cutoff: March 2, 2017.

Abbreviations: 4/7 QD, drug administered 4 days on, 3 days off; AUC<sub>tau</sub>, area under the curve for the dosing interval; BID, twice daily; C, Cycle; *C*<sub>max</sub>, maximum concentration; D, Day;

M/P ratio: metabolite-to-parent ratio, calculated as AUC<sub>inf</sub>, LHA333/AUC<sub>inf</sub>, WNT974 for Day 1 or AUC<sub>tau</sub>, LHA333/AUC<sub>tau</sub>, WNT974 for Day 15, where the AUC<sub>tau</sub> values are corrected by molecular weight; NA, not applicable; ND, no data available; QD, once daily;

Racc, ratio of accumulation, calculated as AUC<sub>tau</sub>, Day 15/AUC<sub>tau</sub>, Day 1;

*T*<sub>1/2</sub>, terminal elimination half-life; *T*<sub>max</sub>, time of *C*<sub>max</sub>.

**Supplementary Table 4.** Adverse events (Grade  $\geq 3$ , occurring in  $\geq 5\%$  of patients, regardless of study drug relationship) by treatment group.

|                        | WNT974<br>5 mg<br>QD<br>n=6 | WNT974<br>7.5 mg<br>QD<br>n=6 | WNT974<br>10 mg<br>QD<br>n=38 | WNT974<br>15 mg<br>QD<br>n=11 | WNT974<br>20 mg<br>QD<br>n=10 | WNT974<br>22.5 mg<br>QD<br>n=6 | WNT974<br>30 mg<br>QD<br>n=5 | WNT974<br>30 mg<br>4/7 QD<br>n=4 | WNT974<br>45 mg<br>4/7 QD<br>n=3 | WNT974<br>5 mg<br>BID<br>n=5 | All<br>patients<br>N=94 |
|------------------------|-----------------------------|-------------------------------|-------------------------------|-------------------------------|-------------------------------|--------------------------------|------------------------------|----------------------------------|----------------------------------|------------------------------|-------------------------|
| <b>Total<br/>n (%)</b> | 3<br>(50.0)                 | 5<br>(83.3)                   | 26<br>(68.4)                  | 8<br>(72.7)                   | 9<br>(90.0)                   | 5<br>(83.3)                    | 4<br>(80.0)                  | 1<br>(25.0)                      | 3<br>(100)                       | 2<br>(40.0)                  | 66<br>(70.2)            |
| Asthenia               | 0                           | 1<br>(16.7)                   | 3<br>(7.9)                    | 1<br>(9.1)                    | 1<br>(10.0)                   | 1<br>(16.7)                    | 0                            | 1<br>(25.0)                      | 0                                | 0                            | 8<br>(8.5)              |
| Fatigue                | 0                           | 0                             | 4<br>(10.5)                   | 1<br>(9.1)                    | 1<br>(10.0)                   | 0                              | 1<br>(20.0)                  | 1<br>(25.0)                      | 0                                | 0                            | 8<br>(8.5)              |
| Dehydration            | 0                           | 0                             | 2<br>(5.3)                    | 0                             | 0                             | 1<br>(16.7)                    | 1<br>(20.0)                  | 0                                | 3<br>(100)                       | 0                            | 7<br>(7.4)              |
| Dyspnoea               | 1<br>(16.7)                 | 1<br>(16.7)                   | 2<br>(5.3)                    | 1<br>(9.1)                    | 0                             | 1<br>(16.7)                    | 0                            | 1<br>(25.0)                      | 0                                | 0                            | 7<br>(7.4)              |
| Vomiting               | 0                           | 0                             | 3<br>(7.9)                    | 1<br>(9.1)                    | 1<br>(10.0)                   | 1<br>(16.7)                    | 0                            | 0                                | 1<br>(33.3)                      | 0                            | 7<br>(7.4)              |
| Anaemia                | 0                           | 1<br>(16.7)                   | 3<br>(7.9)                    | 0                             | 0                             | 1<br>(16.7)                    | 0                            | 0                                | 0                                | 1<br>(20.0)                  | 6<br>(6.4)              |
| Nausea                 | 0                           | 0                             | 3<br>(7.9)                    | 0                             | 0                             | 2<br>(33.3)                    | 0                            | 0                                | 1<br>(33.3)                      | 0                            | 6<br>(6.4)              |
| Abdominal<br>pain      | 1<br>(16.7)                 | 0                             | 3<br>(7.9)                    | 0                             | 1<br>(10.0)                   | 0                              | 0                            | 0                                | 0                                | 0                            | 5<br>(5.3)              |
| Blood ALP<br>increased | 0                           | 1<br>(16.7)                   | 3<br>(7.9)                    | 1<br>(9.1)                    | 0                             | 0                              | 0                            | 0                                | 0                                | 0                            | 5<br>(5.3)              |
| Hyper-<br>calcaemia    | 0                           | 0                             | 3<br>(7.9)                    | 0                             | 0                             | 2<br>(33.3)                    | 0                            | 0                                | 0                                | 0                            | 5<br>(5.3)              |

Data cutoff: 2 March 2017.

Abbreviations: 4/7 QD, drug administered 4 days on, 3 days off; ALP, alkaline phosphatase, BID, twice daily; QD, once daily.

**Supplementary Table 5.** Best overall response by treatment group.

| n (%)                | WNT974<br>5 mg<br>QD<br>n=6 | WNT974<br>7.5 mg<br>QD<br>n=6 | WNT974<br>10 mg<br>QD<br>n=38 | WNT974<br>15 mg<br>QD<br>n=11 | WNT974<br>20 mg<br>QD<br>n=10 | WNT974<br>22.5 mg<br>QD<br>n=6 | WNT974<br>30 mg<br>QD<br>n=5 | WNT974<br>30 mg<br>4/7 QD<br>n=4 | WNT974<br>45 mg<br>4/7 QD<br>n=3 | WNT974<br>5 mg<br>BID<br>n=5 | All<br>patients<br>N=94 |
|----------------------|-----------------------------|-------------------------------|-------------------------------|-------------------------------|-------------------------------|--------------------------------|------------------------------|----------------------------------|----------------------------------|------------------------------|-------------------------|
| Complete response    | 0                           | 0                             | 0                             | 0                             | 0                             | 0                              | 0                            | 0                                | 0                                | 0                            | 0                       |
| Partial response     | 0                           | 0                             | 0                             | 0                             | 0                             | 0                              | 0                            | 0                                | 0                                | 0                            | 0                       |
| Stable disease       | 0                           | 1<br>(16.7)                   | 11<br>(28.9)                  | 1<br>(9.1)                    | 1<br>(10.0)                   | 0                              | 1<br>(20.0)                  | 0                                | 0                                | 0                            | 15<br>(16.0)            |
| Progressive disease  | 3<br>(50.0)                 | 5<br>(83.3)                   | 21<br>(55.3)                  | 6<br>(54.5)                   | 7<br>(70.0)                   | 5<br>(83.3)                    | 2<br>(40.0)                  | 2<br>(50.0)                      | 2<br>(66.7)                      | 3<br>(60.0)                  | 56<br>(59.6)            |
| Non-CR/<br>non-PD    | 0                           | 0                             | 0                             | 1<br>(9.1)                    | 0                             | 0                              | 0                            | 0                                | 0                                | 0                            | 1<br>(1.1)              |
| Unknown <sup>a</sup> | 3<br>(50.0)                 | 0                             | 6<br>(15.8)                   | 3<br>(27.3)                   | 2<br>(20.0)                   | 1<br>(16.7)                    | 2<br>(40.0)                  | 2<br>(50.0)                      | 1<br>(33.3)                      | 2<br>(40.0)                  | 22<br>(23.4)            |

Data cutoff: 2 March 2017.

<sup>a</sup>Best overall response was unknown in 22 patients, due to discontinuation prior to post-baseline assessment in 16 patients, or single assessment not qualifying for a RECIST v1.1 category in 6 patients (SD prior to 6 weeks [n=5] and PD after 12 weeks [n=1]).

Abbreviations: 4/7 QD, drug administered 4 days on, 3 days off; BID, twice daily; CR, complete response; PD, progressive disease; QD, once daily; RECIST, Response Evaluation Criteria in Solid Tumors; SD, stable disease.

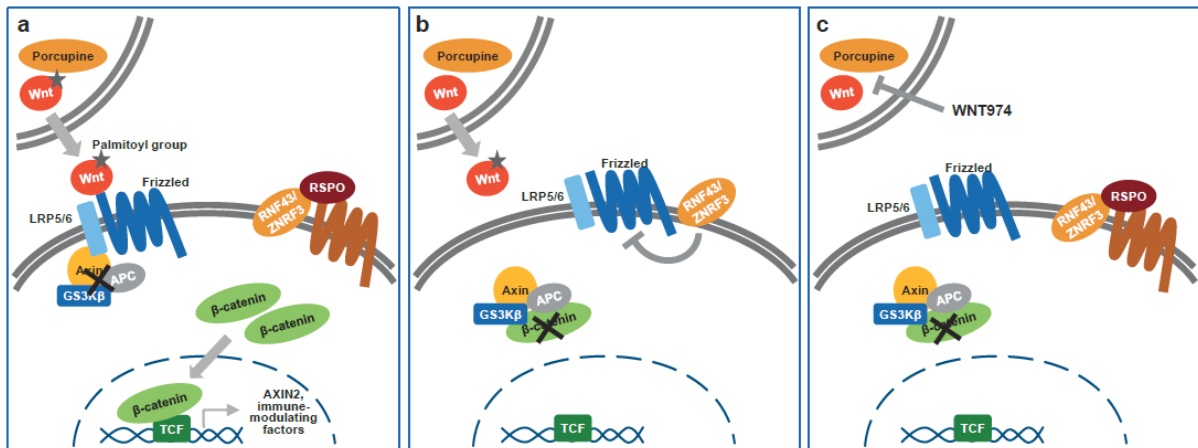

**Supplementary Fig. 1.** The canonical Wnt/β-catenin signalling pathway.

**a)** Palmitoylated Wnt binds co-receptors, LRP5/6 and Frizzled, leading to inactivation of the β-catenin destruction complex. RSPO inhibits RNF43/ZNRF3, increasing levels of the Wnt receptor complex on the cell surface. β-catenin accumulates in the cytoplasm, translocates to the nucleus, and subsequently stimulates transcription of specific genes, including AXIN2. **b)** When not suppressed by RSPO, RNF43/ZNRF3 targets the Wnt receptor complex for degradation, inhibiting Wnt signalling. In the absence of Wnt ligand binding to the receptor complex, the β-catenin destruction complex is active in the cytoplasm and mediates degradation of β-catenin. **c)** In the presence of WNT974, palmitoylation of Wnt ligands is inhibited, preventing secretion.

Abbreviations: APC, adenomatous polyposis coli; LRP5/6, low-density lipoprotein receptor-related protein 5/6; RNF43, ring finger protein 43; RSPO, R-spondin; ZNRF3, zinc and ring finger protein 3.

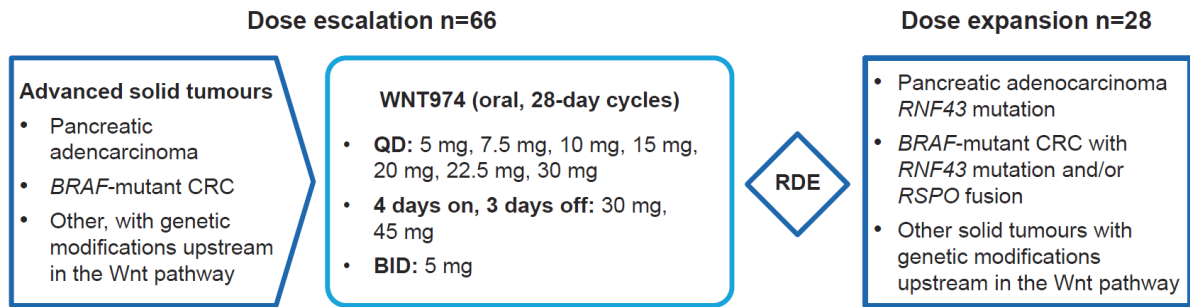

**Supplementary Fig. 2.** Study design.

Abbreviations: BID, twice daily; CRC, colorectal cancer; QD, once daily; RDE, recommended dose for expansion; RNF43, ring finger protein 43; RSPO, R-spondin.



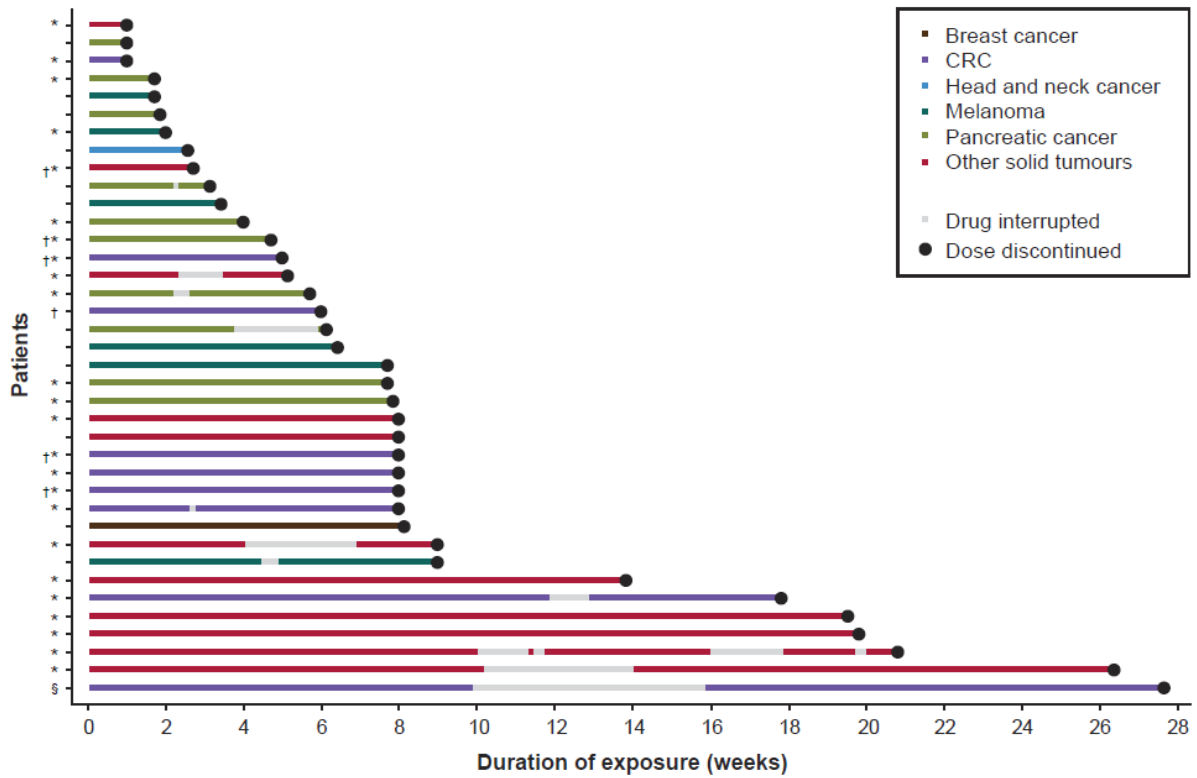

**Supplementary Fig. 3.** Duration of exposure to WNT974 in patients receiving 10 mg QD.

\**RNF43* alteration; †*APC* alteration; ‡*RSPO* fusion. Data cutoff: 2 March 2017.

Abbreviations: APC, adenomatous polyposis coli; CRC, colorectal cancer; QD, once daily; RNF43, ring finger protein 43; RSPO, R-spondin.

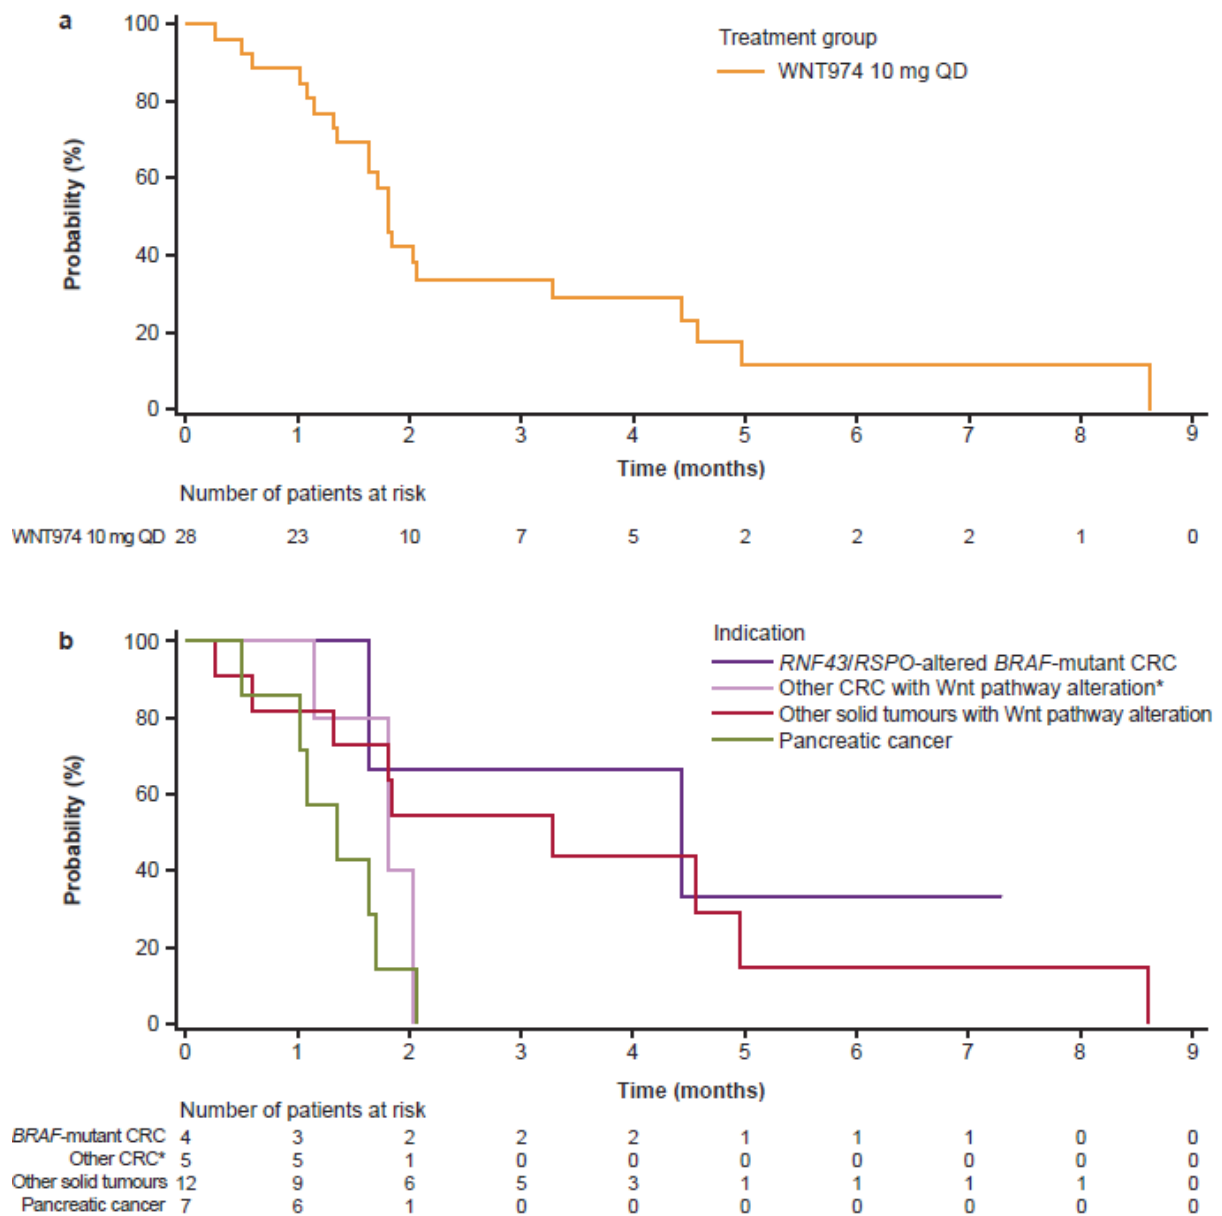

**Supplementary Fig. 4.** Kaplan–Meier plots of progression-free survival (expansion part).

Progression-free survival probability is shown for **a**) all patients in the expansion part of the study and **b**) patients in the expansion part of the study, separated by indication. \*Including *BRAF*-wild-type CRC with *RNF43* mutation. Data cutoff: 2 March 2017.

Abbreviations: CRC, colorectal cancer; QD, once daily; *RNF43*, ring finger protein 43; *RSPO*, R-spondin.

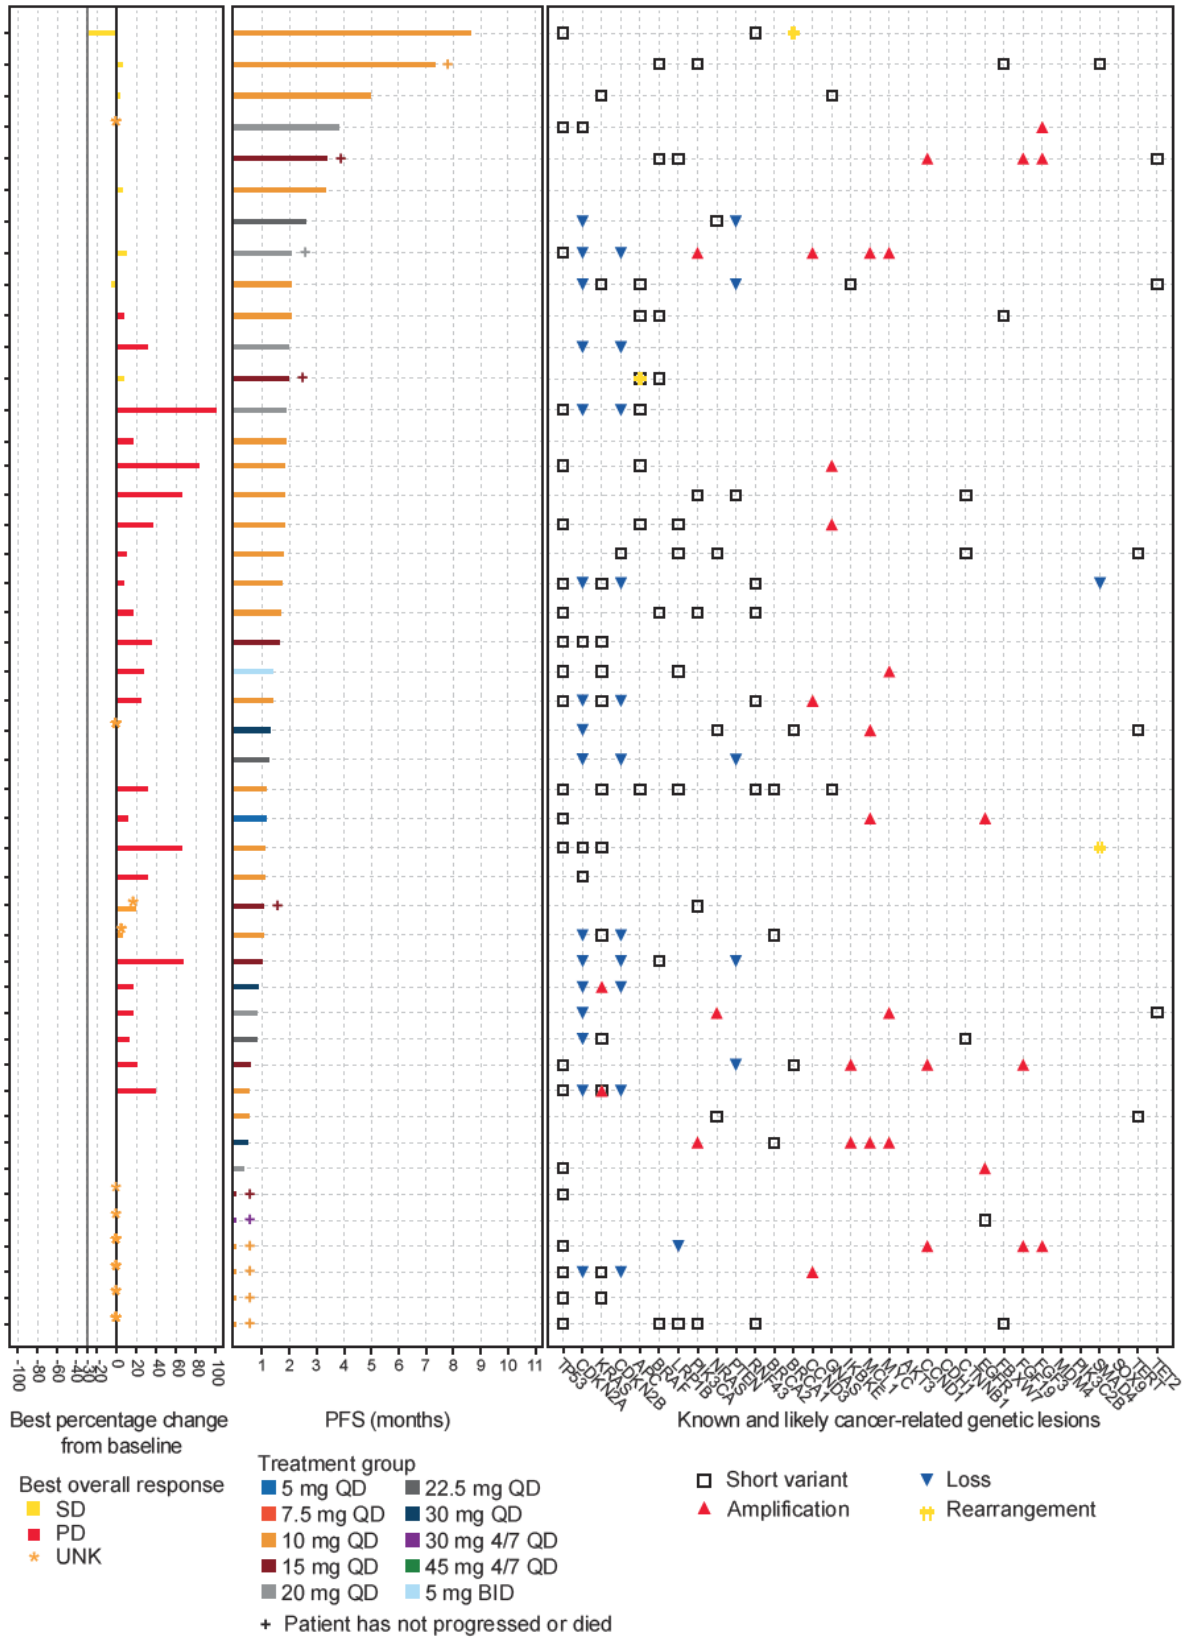

**Supplementary Fig. 5.** Select genetic alterations ordered by best percentage change from baseline.

Best percentage change from baseline and PFS are shown for each patient, alongside alterations in selected genes of known and likely functional significance to cancer, observed in more than 2 patients. Data cutoff: 2 March 2017.

Abbreviations: 4/7 QD, drug administered 4 days on, 3 days off; BID, twice daily; PD, progressive disease; PFS, progression-free survival; QD, once daily; SD, stable disease; UNK, unknown.
